# Supplementary material
Source: HighWire-hosted journal article supplement (https://www.annfammed.org/highwire/filestream/26619/field_highwire_adjunct_files/0/Mazur_Visual_Abstract.pdf)
Supplement: Mazur_Visual_Abstract.pdf [file Mazur_Visual_Abstract.pdf]

# Evaluation of an AI-Based Voice Biomarker Tool to Detect Moderate to Severe Depression

Results from a cross-sectional study analyzing free-form speech samples from over 14,000 adults in the U.S. and Canada

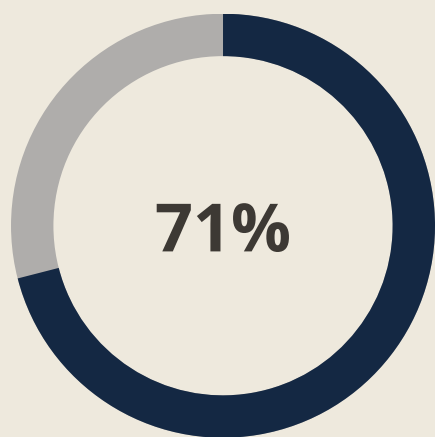

The tool correctly identified depression in 71% of people who had it.

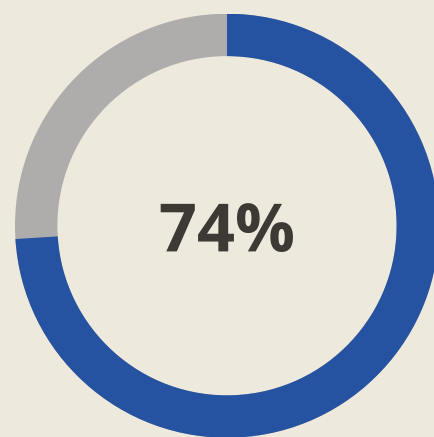

The tool correctly ruled out depression in 74% of people who did not have it.

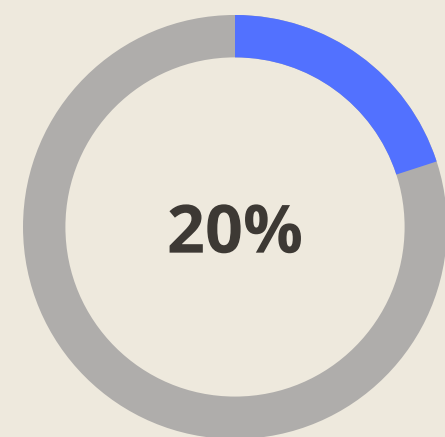

The tool flagged 20% of cases as uncertain, recommending further evaluation by a clinician.

*Source:* Mazur A, Costantino H, Tom P, et al. Evaluation of an AI-based voice biomarker tool to detect signals consistent with moderate to severe depression. *Ann Fam Med.* 2025;23:10.1370/afm.240091
